# Supplementary material for: Setback distances for unconventional oil and gas development: Delphi study results
Source: PubMed Central journal article supplement (PMC6095590; doi:10.1371/journal.pone.0202462), 2018-08-16

**Chart 1. Results of Rounds 1-3 for statements that recommend setbacks for UOGD infrastructure. Consensus = 70%**

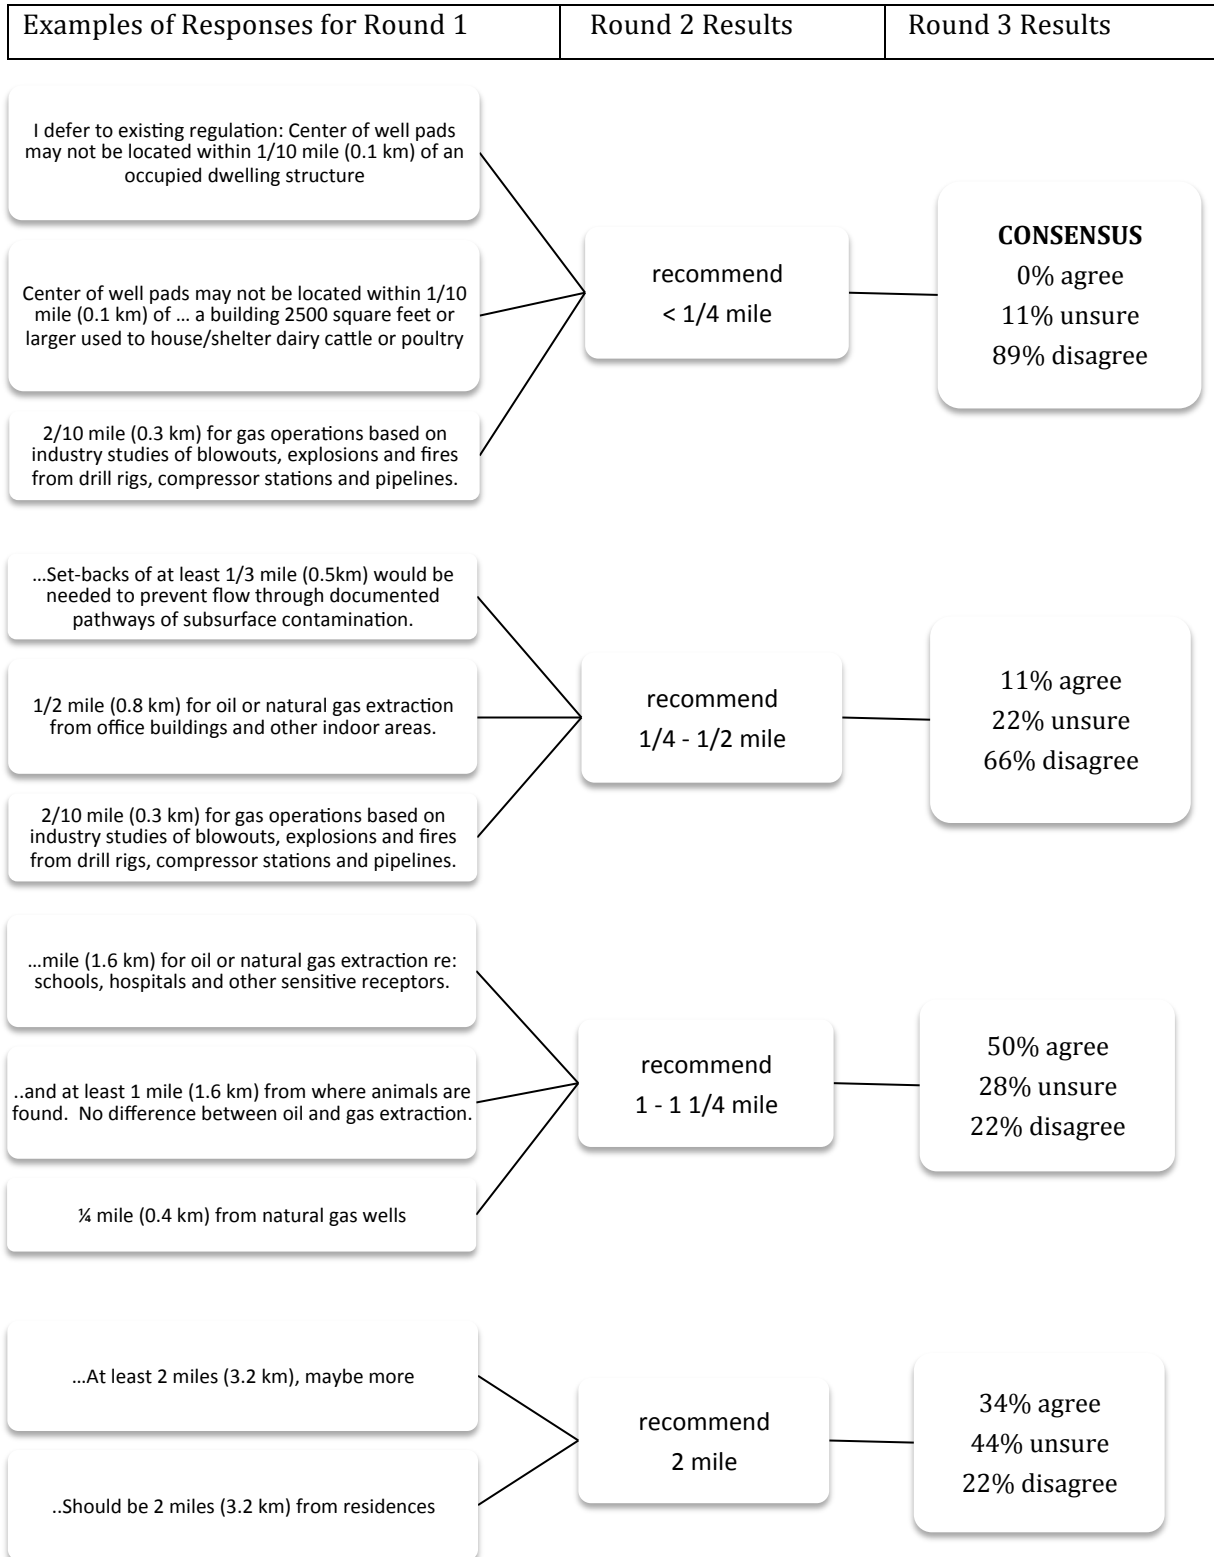

**CHART 2. Results of Rounds 1-3 for statements on the feasibility of setbacks at any distance from UOGD infrastructure. Consensus = 70%**

| Examples of Round 1 Results | Round 2 Results | Round 3 Results |
|-----------------------------|-----------------|-----------------|
|-----------------------------|-----------------|-----------------|

...These considerations apply equally to oil and gas production: Due to our inability, with current information, to predict dispersal pathways accurately, I do not think safe set-back distances can be determined.

response applies to both oil and gas. ...do not take a position on specific distances, in large part because there is no scientifically definitive distance beyond which health impacts would never occur. However, we believe that current setbacks from residential areas are much too short in all states. ...Clearly setbacks in residential areas should be longer than in industrial areas, where gas operations (and other polluting activities) would be clustered.

This is something that is difficult to determine because it depends on the hydrology and air currents

Do not have an opinion on an appropriate set-back distance because I don't believe there is enough evidence to inform an opinion.

There are no appropriate set-back distances for recreation areas near oil production. Ambient air quality is affected by VOCs. We have no proof of what constitutes a safe set-back distance. Cumulative effects have yet to be studied.

Again the distinction between oil and gas is not important. I think there are appropriate, science based setbacks that could be developed. I agree with the position that the ones that exist are not science based at all (or only limited science was used, e.g., 150 ft setback based on the height of a drill rig) and are based on political compromises.

It may not be feasible to recommend setback distances

67% agree  
6% unsure  
28% disagree

**CHART 3. Results of Rounds 1-3 for statements that address the needs of vulnerable populations. Consensus = 70%**

| Round 1 Results | Round 2 Results | Round 3 Results |
|-----------------|-----------------|-----------------|
|-----------------|-----------------|-----------------|

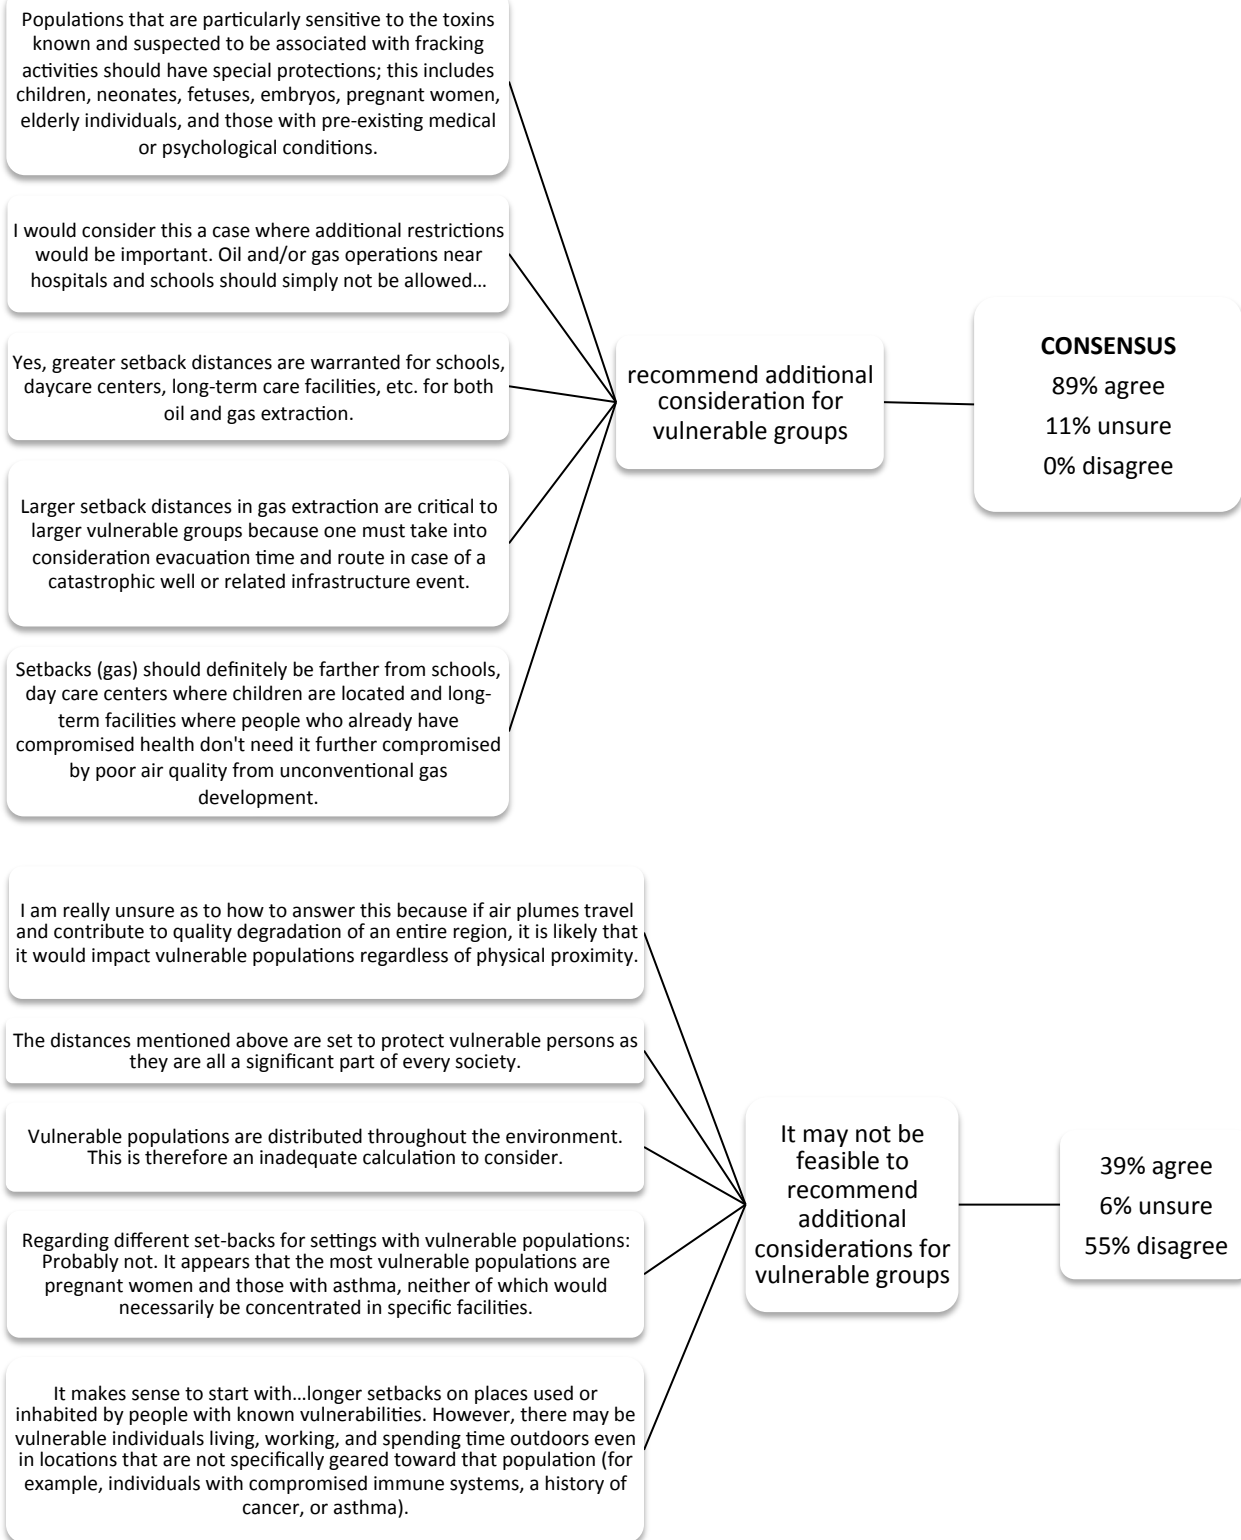

Supplement: pone.0202462.s001.pdf [file pone.0202462.s001.pdf]
